# Supplementary material for: Chitosan as a Bio-Based Ligand for the Production of Hydrogenation Catalysts
Source: MDPI journal article supplement (doi:10.3390/molecules29092083), 2024-05-01
Supplement: s1 [file s1]

# Chitosan as a Bio-based Ligand for the Production of Hydrogenation Catalysts

Stefano Paganelli<sup>1,2\*</sup>, Eleonora Brugnera<sup>1</sup>, Alessandro Di Michele<sup>3</sup>, Manuela Facchin<sup>1</sup>, and Valentina Beghetto<sup>1,2,4\*</sup>

<sup>1</sup> Department of Molecular Sciences and Nanosystems, University Ca' Foscari of Venice, Via Torino 155, 30172 Mestre, Italy.

<sup>2</sup> Consorzio Interuniversitario per le Reattività Chimiche e la Catalisi (CIRCC), via C. Ulpiani 27, 70126 Bari, Italy.

<sup>3</sup> Università degli Studi di Perugia, Dipartimento Fisica e Geologia, Via Pascoli, 06123 Perugia, Italy.

<sup>4</sup> Crossing S.r.l., Viale della Repubblica 193/b, 31100 Treviso, Italy.

\*Corresponding Authors: beghetto@unive.it; Tel.: +39-041-234-8928; spag@unive.it; Tel.: +390412348592

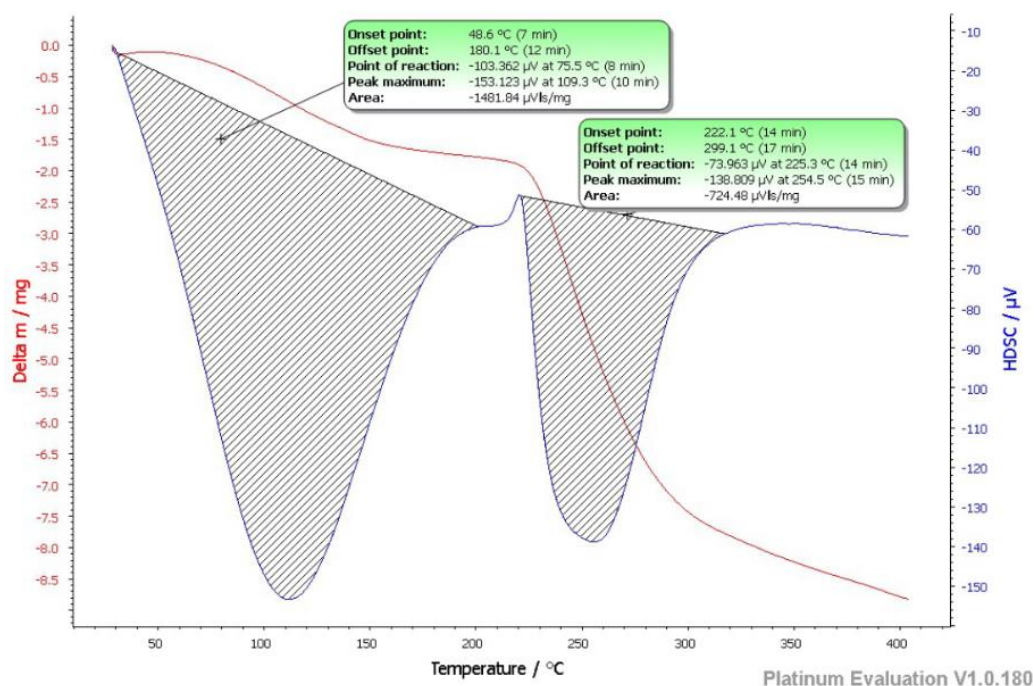

Figure S1 DSC and TGA profiles of Chitosan Hydrochloride

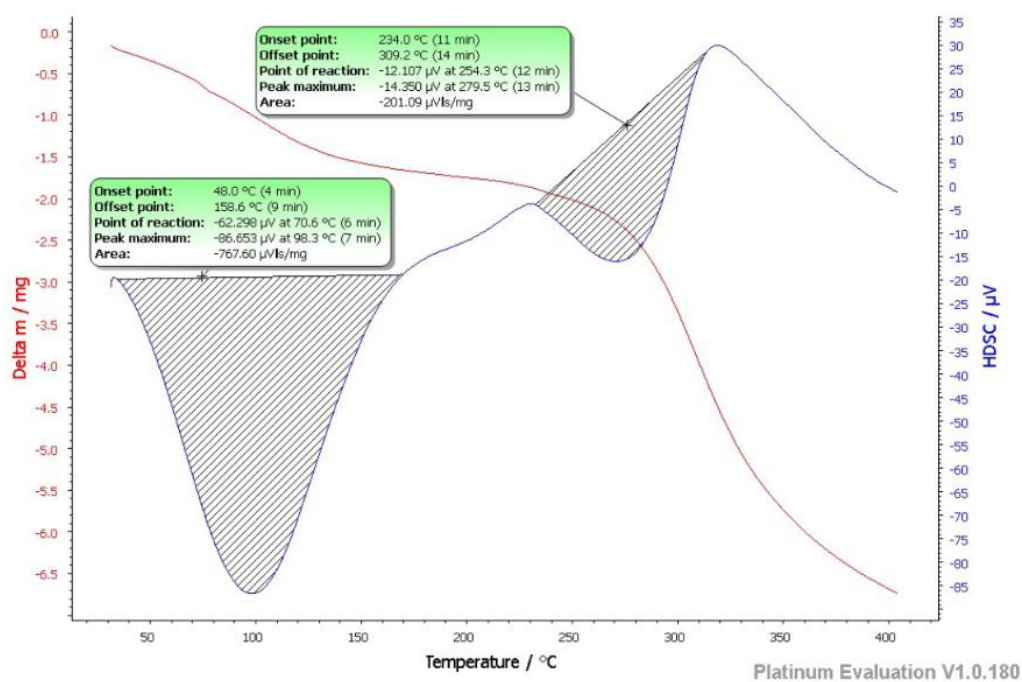

Figure S2 DSC and TGA profiles of Rh(0)-CS.

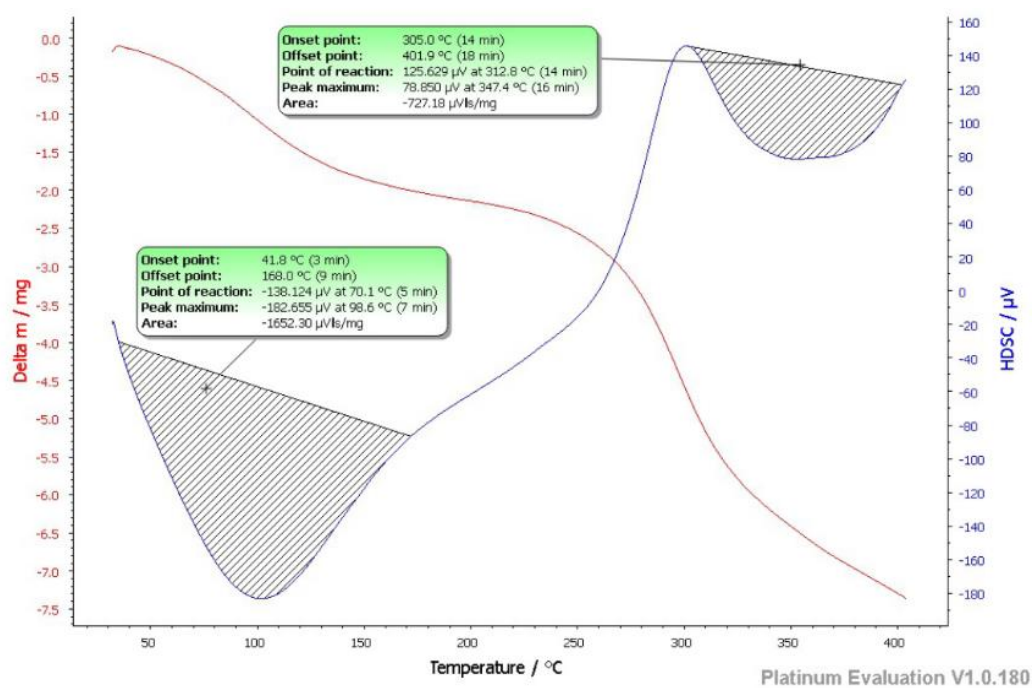

Figure S3 DSC and TGA profiles of Ru(0)-CS.
